# Supplementary material
Source: PubMed Central journal article supplement (PMC5326535)
Supplement: rspb20162744supp1.pdf [file rspb20162744supp1.pdf]

## Electronic Supplementary Material

### Trial-and-error copying of demonstrated actions reveals how fledglings learn to “imitate” their mothers

Noa Truskanov and Arnon Lotem

**Figure S1: The distribution of actions performed by each individual during test and training phases** (aggregated group data are described in Figures 2 and 3 of the main text)

The number of successful pecking actions (in white), successful pushing actions (in grey) and grabbing of leaves' tips (in black) performed by each of the fledglings of both experimental groups in: (a) the test phase; and (b) the training phase. Pushing demonstration group: n = 10, pecking demonstration group: n = 8. Fledglings of the first and second cohorts are denoted by numbers a1-11 and b1-b7 respectively

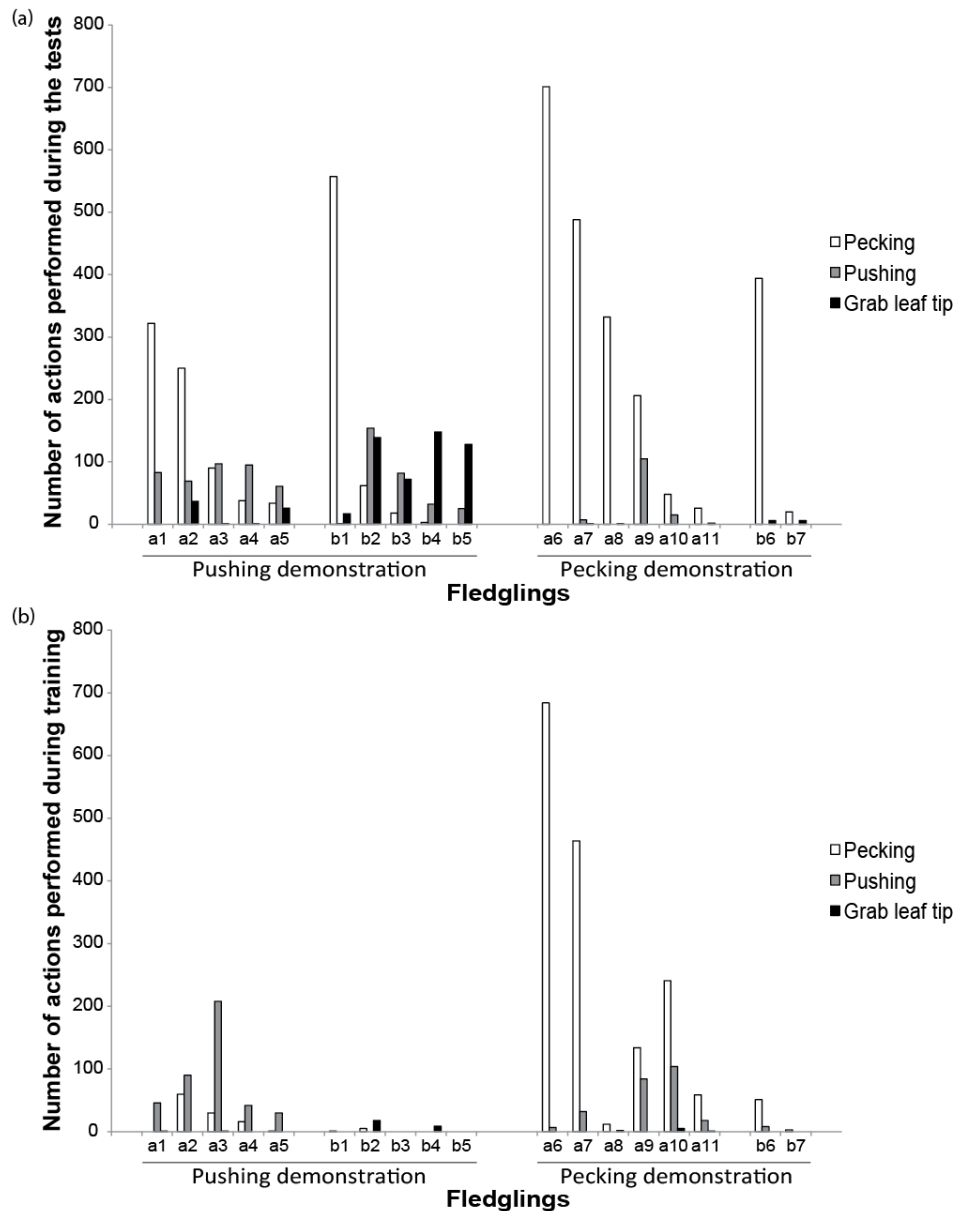

**Figure S2: Performance of independent actions during training**

The average numbers of different successful actions performed by fledglings of both experimental groups in each training session: pushing demonstration group: n=10, successful pecking denoted by (●), successful pushing by (▲). Pecking demonstration group: n=8, successful pecking denoted by (○), successful pushing by (△).

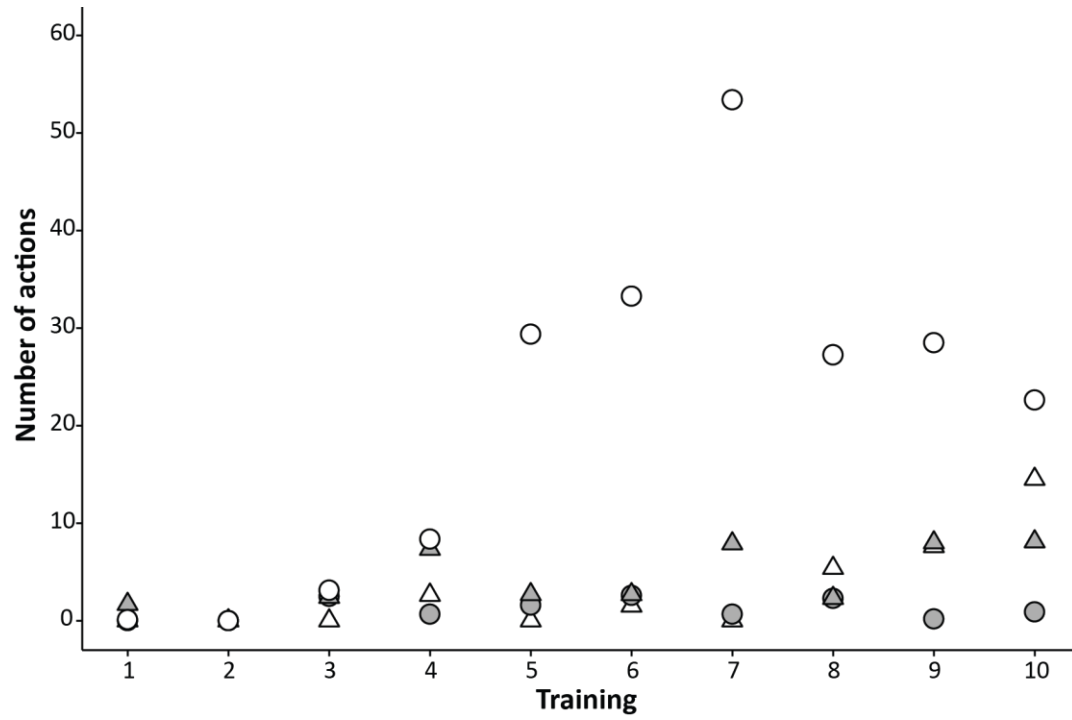

**Table S1: Action performance during the training phase**

Linear models exploring differences between treatment groups in the amounts of the different actions performed during the training phase. All models included intercept (not shown) and were based on N=18 birds. Due to technical problems, for three of the fledglings (two from the pushing mother group and one from the pecking mother group) one of the training videos was missing. For analysis involving data from the training period, we repeated the analysis while excluding these fledglings and found no differences in the effect sizes.

| <b>Model</b> | <b>Response</b>                | <b>Effects</b> | <b>Df</b> | <b>Likelihood ratio <math>\chi^2</math></b> | <b>P</b> |
|--------------|--------------------------------|----------------|-----------|---------------------------------------------|----------|
| <b>SA</b>    | Joining events                 | Group          | 1         | 0.134                                       | 0.714    |
|              |                                | Cohort         | 1         | 5.435                                       | 0.019    |
|              |                                | Interaction    | 1         | 0.298                                       | 0.585    |
| <b>SB</b>    | Independent successful actions | Group          | 1         | 3.525                                       | 0.06     |
|              |                                | Cohort         | 1         | 10.749                                      | 0.001    |
|              |                                | Interaction    | 1         | 0.164                                       | 0.686    |
| <b>SC</b>    | Successful pushing             | Group          | 1         | 0.41                                        | 0.522    |
|              |                                | Cohort         | 1         | 13.372                                      | 0.0003   |
|              |                                | Interaction    | 1         | 2.555                                       | 0.11     |
| <b>SD</b>    | Successful pecking             | Group          | 1         | 6.871                                       | 0.009    |
|              |                                | Cohort         | 1         | 5.648                                       | 0.017    |
|              |                                | Interaction    | 1         | 1.803                                       | 0.179    |
| <b>SE</b>    | Unproductive attempts          | Group          | 1         | 0.019                                       | 0.889    |
|              |                                | Cohort         | 1         | 0.27                                        | 0.603    |
|              |                                | Interaction    | 1         | 0.417                                       | 0.519    |

\*All analyses performed on transformed data

**Table S2: Effect of treatment and cohort on pushing and pecking actions performed during the test** (see also Table 1 and Figure 2 in the main text)

Linear models exploring differences between treatment groups in the amounts of pushing and pecking actions performed during the test phase. All models included intercept (not shown) and were based on N=18 birds.

| <b>Model</b> | <b>Response</b>    | <b>Effects</b> | <b>Df</b> | <b>Likelihood ratio <math>\chi^2</math></b> | <b>P</b> |
|--------------|--------------------|----------------|-----------|---------------------------------------------|----------|
| <b>SF</b>    | Successful pushing | Group          | 1         | 12.221                                      | 0.0005   |
|              |                    | Cohort         | 1         | 2.617                                       | 0.106    |
|              |                    | Interaction    | 1         | 0.022                                       | 0.882    |
| <b>SG</b>    | Successful pecking | Group          | 1         | 1.421                                       | 0.233    |
|              |                    | Cohort         | 1         | 0.827                                       | 0.363    |
|              |                    | Interaction    | 1         | 0.0006                                      | 0.98     |

\*All analyses performed on transformed data

**Table S3: Analysis of action performance using permutation-based factorial Anova models**

Analysis of action performance in both training and test phases using permutation-based factorial Anova models with 10,000 unrestricted permutations. This analysis corresponds to the linear models provided in the main text (table 1) and above (tables S1 and S2). All models explored the effect of experimental group and cohort on the fledglings' performance of different action types during either training or test phases. The models are based on a sample size of N=18 birds.

| <b>Model</b>          | <b>Response</b>                                                  | <b>Effects</b> | <b>Df</b> | <b>F</b> | <b>P</b> |
|-----------------------|------------------------------------------------------------------|----------------|-----------|----------|----------|
| <b>Test phase</b>     |                                                                  |                |           |          |          |
| <b>SH</b>             | Pushing proportion<br>(out of successful<br>action performances) | Group          | 1         | 13.393   | 0.003    |
|                       |                                                                  | Cohort         | 1         | 3.255    | 0.091    |
|                       |                                                                  | Interaction    | 1         | 1.454    | 0.240    |
| <b>SI</b>             | Unproductive<br>attempts (total)                                 | Group          | 1         | 8.150    | 0.013    |
|                       |                                                                  | Cohort         | 1         | 28.286   | 0.0002   |
|                       |                                                                  | Interaction    | 1         | 4.423    | 0.051    |
| <b>SJ</b>             | Grabbing leaf tip                                                | Group          | 1         | 7.141    | 0.015    |
|                       |                                                                  | Cohort         | 1         | 20.201   | 0.001    |
|                       |                                                                  | Interaction    | 1         | 6.620    | 0.023    |
| <b>SK</b>             | Successful pushing                                               | Group          | 1         | 8.431    | 0.012    |
|                       |                                                                  | Cohort         | 1         | 0.099    | 0.765    |
|                       |                                                                  | Interaction    | 1         | 0.001    | 0.980    |
| <b>SL</b>             | Successful Pecking                                               | Group          | 1         | 1.327    | 0.265    |
|                       |                                                                  | Cohort         | 1         | 0.534    | 0.489    |
|                       |                                                                  | Interaction    | 1         | 0.101    | 0.764    |
| <b>Training phase</b> |                                                                  |                |           |          |          |
| <b>SM</b>             | Joining events                                                   | Group          | 1         | 0.013    | 0.914    |
|                       |                                                                  | Cohort         | 1         | 6.594    | 0.021    |
|                       |                                                                  | Interaction    | 1         | 0.114    | 0.743    |
| <b>SN</b>             | Independent<br>successful actions                                | Group          | 1         | 3.248    | 0.090    |
|                       |                                                                  | Cohort         | 1         | 6.898    | 0.018    |
|                       |                                                                  | Interaction    | 1         | 1.065    | 0.334    |
| <b>SO</b>             | Successful pushing                                               | Group          | 1         | 1.318    | 0.291    |
|                       |                                                                  | Cohort         | 1         | 6.750    | 0.013    |
|                       |                                                                  | Interaction    | 1         | 0.915    | 0.374    |
| <b>SP</b>             | Successful pecking                                               | Group          | 1         | 4.855    | 0.024    |
|                       |                                                                  | Cohort         | 1         | 3.725    | 0.052    |
|                       |                                                                  | Interaction    | 1         | 1.826    | 0.190    |
| <b>SQ</b>             | Unproductive<br>attempts                                         | Group          | 1         | 0.001    | 0.973    |
|                       |                                                                  | Cohort         | 1         | 0.032    | 0.868    |
|                       |                                                                  | Interaction    | 1         | 0.024    | 0.887    |

## **Hand-rearing of sparrow nestlings**

Two cohorts of 12 nestlings were taken from nests in the captive house sparrow colony of I. Meier Segal's Garden of Zoological Research, Tel-Aviv University. In each cohort, no more than three nestlings were taken from the same nest, with two nestlings from each nest being the common procedure. Our final sample size of 18 fledglings originated from 12 different nests and nestmates were assigned to separate experimental treatments where possible.

Nestlings were raised in three incubators, containing separate rearing boxes (10×10 cm and 8 cm high) lined with cotton wool and dry straw, weighed every morning before feeding started, and fed from syringes containing a mixture of commercial hand-rearing blend, vitamins, calcium and minced fly larvae (supplemented by mashed boiled eggs from the age of 7-8 days). Feeding sessions during which nestlings were fed to satiation were carried out at 5–30 min intervals throughout the day (0700–1900 hours). To imprint the nestlings on the mother model, they were fed adjacent to its beak, while the mother model itself was oriented towards the nestling. All individuals were ringed with a numbered aluminium ring and plastic colour rings to ensure individual recognition at later stages.

Towards fledging, at the age of 14 days, all individuals were transferred to separate cages that were located in the outdoor premises of the Zoological Garden. The cages (75×45 cm and 45 cm high) were visually isolated from each other and contained a rearing box (the old 'nest' from which the young had fledged), wooden branches and artificial foliage at the rear, and a wooden board at the front. A water bowl and a food bowl containing an ad libitum supply of commercial seed mixture and grated boiled eggs were placed on top of the board. Feeding was gradually shifted from hand rearing to joint pecking with the mother model, which continued to be introduced to the fledglings throughout this stage (the mother model's body was connected to a pole, enabling the experimenter to move it around freely and mimic a foraging sparrow. See Figure 1a in the main text). The experiment began only after all the individuals were capable of feeding independently and pecking at millet seeds. It is important to note that the fledglings were still highly attached to the mother model at this stage, running or flying towards it when it arrived at the cage, begging and following it around.
